# Supplementary material
Source: PubMed Central journal article supplement (PMC8058899)
Supplement: mmc4.pdf [file mmc4.pdf]

. metabias \_ES \_seES , egger

Note: data input format *theta se\_theta* assumed

Egger's test for small-study effects:  
Regress standard normal deviate of intervention  
effect estimate against its standard error

Number of studies = 3

Root MSE = .4155

| Std_Eff | Coef.     | Std. Err. | t     | P> t  | [95% Conf. Interval] |          |
|---------|-----------|-----------|-------|-------|----------------------|----------|
| slope   | -.5614912 | .1263154  | -4.45 | 0.141 | -2.166481            | 1.043499 |
| bias    | 1.270113  | .4364604  | 2.91  | 0.211 | -4.275642            | 6.815867 |

Test of H0: no small-study effects

P = 0.211
