# Supplementary material
Source: PubMed Central journal article supplement (PMC8058899)
Supplement: mmc5.pdf [file mmc5.pdf]

Studies included: 2

Participants included: Unknown

Meta-analysis pooling of aggregate data  
using the common-effect inverse-variance model

Test of overall effect = 0:  $z = -1.772$   $p = 0.076$

Heterogeneity measures, calculated from the data  
with Conf. Intervals based on non-central  $\chi^2$  (common-effect) distribution for Q

| Measure            | Value                  | df    | p-value |
|--------------------|------------------------|-------|---------|
| Cochran's Q        | 0.76                   | 1     | 0.384   |
|                    | -[95% Conf. Interval]- |       |         |
| H                  | 0.871                  | 1.000 | 2.241   |
| I <sup>2</sup> (%) | 0.0%                   | 0.0%  | 80.1%   |

H = relative excess in Cochran's Q over its degrees-of-freedom

I<sup>2</sup> = proportion of total variation in effect estimate due to between-study heterogeneity (based on Q)
