# Supplementary material
Source: PubMed Central journal article supplement (PMC8058899)

Funnel plot with pseudo 95% confidence limits

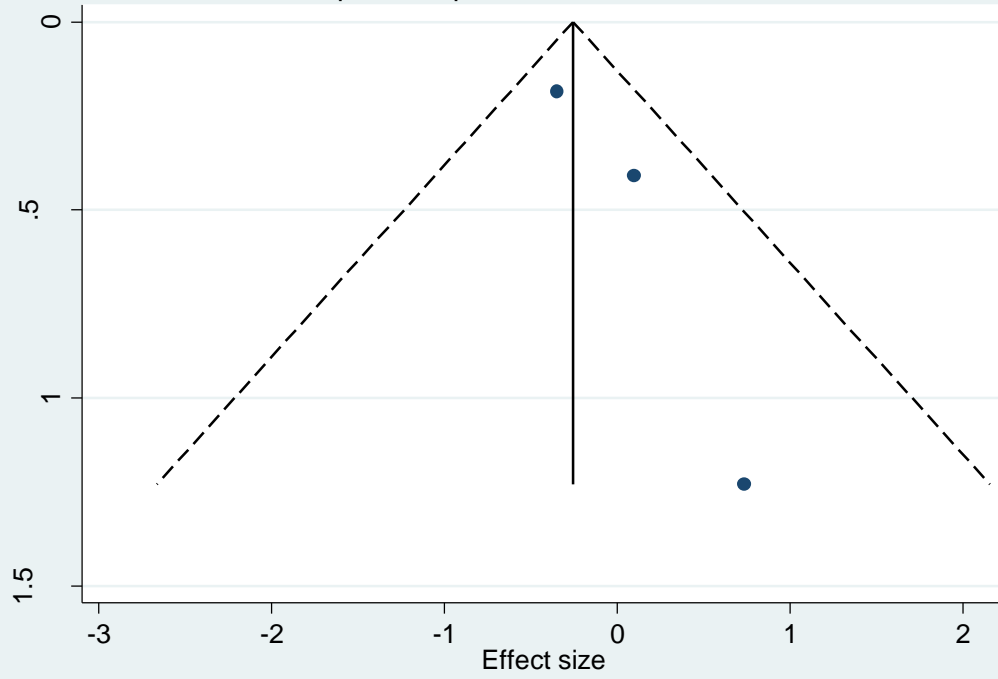

Supplement: mmc3.pdf [file mmc3.pdf]

Funnel plot with pseudo 95% confidence limits

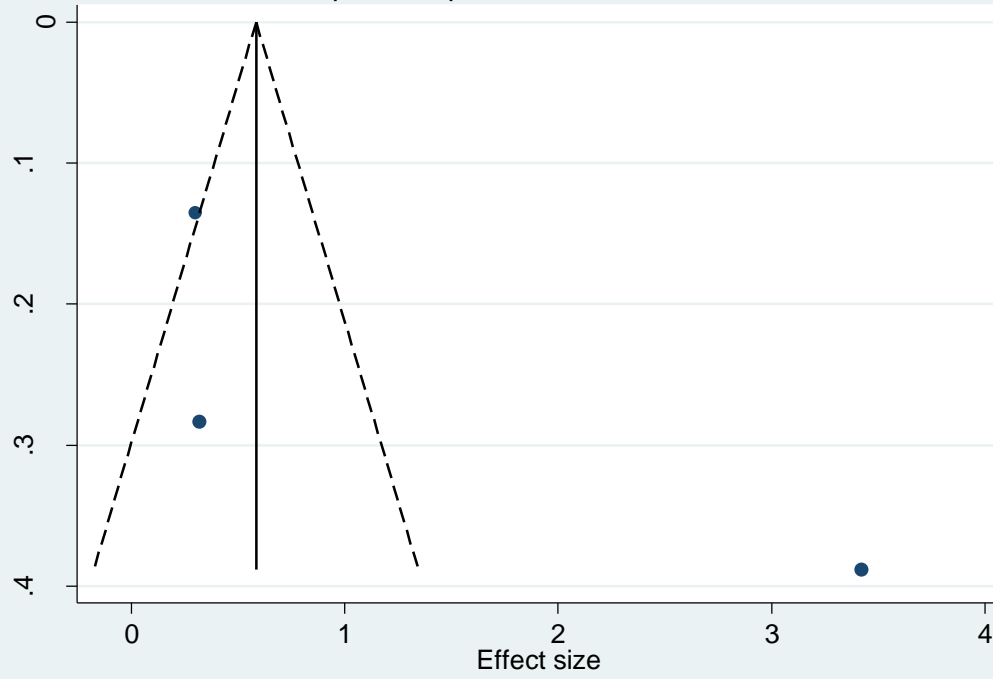

Supplement: mmc6.pdf [file mmc6.pdf]

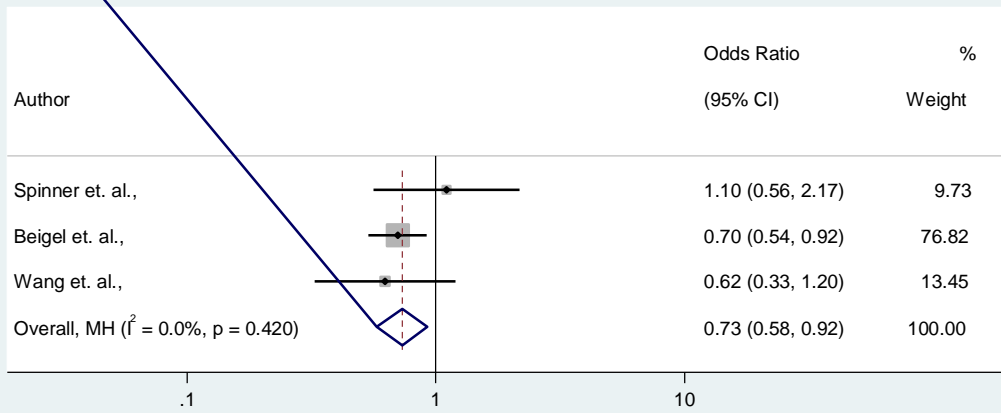

NOTE: Weights are from Mantel-Haenszel model

Supplement: mmc7.pdf [file mmc7.pdf]
